# Supplementary material for: Development and validation of predictive nomogram for postoperative non-union of closed femoral shaft fracture
Source: Springer Nature journal article supplement (doi:10.1038/s41598-024-53356-x), 2024-02-12
Supplement: 41598_2024_53356_MOESM1_ESM.pdf [file 41598_2024_53356_MOESM1_ESM.pdf]

# Development and validation of predictive nomogram for postoperative non-union of closed femoral shaft fracture

Wenjing Li <sup>a,b,c,1</sup>, Yan Wang <sup>a,b,c,1</sup>, Shuai Zhou <sup>a,b,c</sup>, Shihang Liu <sup>a,b,c</sup>, Luqin Di <sup>c</sup>, Wei Chen <sup>a,c,\*</sup>, Hongzhi Lv <sup>a,b,c\*</sup>

**SI Table 1** Sex and age comparison between included and excluded patients [n (%)]

| Variable          | All        | Included patients<br>(n=729) | Excluded patients<br>(n=1024) | $\chi^2$ value | P value |
|-------------------|------------|------------------------------|-------------------------------|----------------|---------|
| <b>Sex</b>        |            |                              |                               | 2.469          | 0.116   |
| Male              | 1298(74.0) | 554(76.0)                    | 744(72.7)                     |                |         |
| Female            | 455(26.0)  | 175(24.0)                    | 280(27.3)                     |                |         |
| <b>Age(years)</b> |            |                              |                               | 7.109          | 0.213   |
| 0-10              | 527(30.1)  | 203(27.8)                    | 324(31.6)                     |                |         |
| 11-20             | 242(13.8)  | 106(14.5)                    | 136(13.3)                     |                |         |
| 21-30             | 351(20.0)  | 155(21.3)                    | 196(19.1)                     |                |         |
| 31-40             | 233(13.3)  | 104(14.3)                    | 129(12.6)                     |                |         |
| 41-50             | 202(11.5)  | 89(12.2)                     | 113(11.0)                     |                |         |
| >50               | 198(11.3)  | 72(9.9)                      | 126(12.3)                     |                |         |

**SI Table 2** Characteristics of closed femoral shaft fracture patients [n (%)]

| Variable                       | All       | Training cohort<br>(n=617) | Validation cohort<br>(n=112) | $\chi^2$<br>value | P value |
|--------------------------------|-----------|----------------------------|------------------------------|-------------------|---------|
| <b>Postoperative non-union</b> |           |                            |                              | 3.026             | 0.082   |
| Yes                            | 66(9.1)   | 51 (8.3)                   | 15(13.4)                     |                   |         |
| No                             | 663(90.9) | 566(91.7)                  | 97(86.6)                     |                   |         |
| <b>Sex</b>                     |           |                            |                              | 0.482             | 0.488   |
| Male                           | 554(76.0) | 466(75.5)                  | 88(78.6)                     |                   |         |
| Female                         | 175(24.0) | 151(24.5)                  | 24(21.4)                     |                   |         |
| <b>Age(years)</b>              |           |                            |                              | 11.084            | 0.050   |
| 0-10                           | 203(27.8) | 159(25.8)                  | 44(39.3)                     |                   |         |
| 11-20                          | 106(14.5) | 90(14.6)                   | 16(14.3)                     |                   |         |
| 21-30                          | 155(21.3) | 135(21.9)                  | 20(17.9)                     |                   |         |
| 31-40                          | 104(14.3) | 90(14.6)                   | 14(12.5)                     |                   |         |
| 41-50                          | 89(12.2)  | 82(13.3)                   | 7(6.3)                       |                   |         |
| >50                            | 72(9.9)   | 61(9.9)                    | 11(9.8)                      |                   |         |
| <b>Ethnic origin</b>           |           |                            |                              | 0.031             | 0.861   |
| Han                            | 711(97.5) | 601(97.4)                  | 110(98.2)                    |                   |         |
| Others                         | 18(2.5)   | 16(2.6)                    | 2(1.8)                       |                   |         |
| <b>Urbanization</b>            |           |                            |                              | 0.019             | 0.890   |
| Urban area                     | 127(17.4) | 108(17.5)                  | 19(17.0)                     |                   |         |
| Rural area                     | 602(82.6) | 509(82.5)                  | 93(83.0)                     |                   |         |
| <b>Occupation</b>              |           |                            |                              | 9.191             | 0.102   |
| Student                        | 230(31.6) | 186(30.1)                  | 44(39.3)                     |                   |         |
| Office worker                  | 66(9.1)   | 51(8.3)                    | 15(13.4)                     |                   |         |
| Farmer                         | 214(29.4) | 190(30.8)                  | 24(21.4)                     |                   |         |
| Manual worker                  | 30(4.1)   | 27(4.4)                    | 3(2.7)                       |                   |         |
| Retired or Unemployed          | 17(2.3)   | 15(2.4)                    | 2(1.8)                       |                   |         |
| Others                         | 172(23.6) | 148(24.0)                  | 24(21.4)                     |                   |         |
| <b>BMI (kg/m<sup>2</sup>)</b>  |           |                            |                              | 15.571            | 0.001   |
| < 18.5                         | 218(29.9) | 180(29.2)                  | 38(33.9)                     |                   |         |
| 18.5-23.9                      | 253(34.7) | 211(34.2)                  | 42(37.5)                     |                   |         |
| 24-27.9                        | 234(32.1) | 211(34.2)                  | 23(20.5)                     |                   |         |
| ≥ 28.0                         | 24(3.3)   | 15(2.4)                    | 9(8.0)                       |                   |         |
| <b>Season</b>                  |           |                            |                              | 5.237             | 0.155   |
| Spring                         | 191(26.2) | 157(25.4)                  | 34(30.4)                     |                   |         |
| Summer                         | 168(23.0) | 136(22.0)                  | 32(28.6)                     |                   |         |
| Autumn                         | 214(29.4) | 186(30.1)                  | 28(25.0)                     |                   |         |
| Winter                         | 156(21.4) | 138(22.4)                  | 18(16.1)                     |                   |         |
| <b>Smoking</b>                 |           |                            |                              | 8.478             | 0.004   |
| Yes                            | 129(17.7) | 120(19.4)                  | 9(8.0)                       |                   |         |
| No                             | 600(82.3) | 497(80.6)                  | 103(92.0)                    |                   |         |
| <b>Drinking</b>                |           |                            |                              | 2.304             | 0.129   |

|                                                 |           |           |            |        |       |
|-------------------------------------------------|-----------|-----------|------------|--------|-------|
| Yes                                             | 135(18.5) | 120(19.4) | 15(13.4)   |        |       |
| No                                              | 594(81.5) | 497(80.6) | 97(86.6)   |        |       |
| <b>AO/OTA classification</b>                    |           |           |            | 0.553  | 0.759 |
| A                                               | 401(55.0) | 341(55.3) | 60(53.6)   |        |       |
| B                                               | 221(30.3) | 188(30.5) | 33(29.5)   |        |       |
| C                                               | 107(14.7) | 88(14.3)  | 19(17.0)   |        |       |
| <b>Injury cause</b>                             |           |           |            | 6.328  | 0.176 |
| Traffic accident                                | 289(39.6) | 237(38.4) | 52(46.4)   |        |       |
| Fall on the flat ground                         | 179(24.6) | 148(24.0) | 31(27.7)   |        |       |
| Fall from a high altitude                       | 30(4.1)   | 27(4.4)   | 3(2.7)     |        |       |
| Heavy objects crash                             | 207(28.4) | 185(30.0) | 22(19.6)   |        |       |
| Other                                           | 24(3.3)   | 20(3.2)   | 4(3.6)     |        |       |
| <b>Preoperative combined injuries</b>           |           |           |            | 2.055  | 0.152 |
| Yes                                             | 265(36.4) | 231(37.4) | 34(30.4)   |        |       |
| No                                              | 464(63.6) | 386(62.6) | 78(69.6)   |        |       |
| <b>Hypoalbuminemia</b>                          |           |           |            | 0.037  | 0.848 |
| Yes                                             | 27(3.7)   | 22(3.6)   | 5(4.5)     |        |       |
| No                                              | 702(96.3) | 595(96.4) | 107(95.5)  |        |       |
| <b>Diabetes</b>                                 |           |           |            | 1.350  | 0.245 |
| Yes                                             | 13(1.8)   | 13(2.1)   | 0(0.0)     |        |       |
| No                                              | 716(98.2) | 604(97.9) | 112(100.0) |        |       |
| <b>Hypertension</b>                             |           |           |            | 1.318  | 0.251 |
| Yes                                             | 18(2.5)   | 13(2.1)   | 5(4.5)     |        |       |
| No                                              | 711(97.5) | 604(97.9) | 107(95.5)  |        |       |
| <b>Coronary heart disease</b>                   |           |           |            | 0.152  | 0.696 |
| Yes                                             | 13(1.8)   | 10(1.6)   | 3(2.7)     |        |       |
| No                                              | 716(98.2) | 607(98.4) | 109(97.3)  |        |       |
| <b>Osteoporosis</b>                             |           |           |            | 0.077  | 0.781 |
| Yes                                             | 12(1.6)   | 11(1.8)   | 1(0.9)     |        |       |
| No                                              | 717(98.4) | 606(98.2) | 111(99.1)  |        |       |
| <b>Respiratory system disease</b>               |           |           |            | 1.62   | 0.203 |
| Yes                                             | 22(3.0)   | 16(2.6)   | 6(5.4)     |        |       |
| No                                              | 707(97.0) | 601(97.4) | 106(94.6)  |        |       |
| <b>Hepatobiliary system disease</b>             |           |           |            | 0.452  | 0.501 |
| Yes                                             | 22(3.0)   | 17(2.8)   | 5(4.5)     |        |       |
| No                                              | 707(97.0) | 600(97.2) | 107(95.5)  |        |       |
| <b>Anemia</b>                                   |           |           |            | 10.594 | 0.001 |
| Yes                                             | 14(1.9)   | 7(1.1)    | 7(6.3)     |        |       |
| No                                              | 715(98.1) | 610(98.9) | 105(93.8)  |        |       |
| <b>Other preoperative underlying conditions</b> |           |           |            | 1.829  | 0.176 |
| Yes                                             | 34(4.7)   | 26(4.2)   | 8(7.1)     |        |       |
| No                                              | 695(95.3) | 591(95.8) | 104(92.9)  |        |       |
| <b>Waiting time for surgery(days)</b>           |           |           |            | 3.062  | 0.216 |

|                                                  |           |           |           |        |       |
|--------------------------------------------------|-----------|-----------|-----------|--------|-------|
| 0-7                                              | 593(81.3) | 496(80.4) | 97(86.6)  |        |       |
| 8-14                                             | 105(14.4) | 92(14.9)  | 13(11.6)  |        |       |
| >14                                              | 31(4.3)   | 29(4.7)   | 2(1.8)    |        |       |
| <b>Operation method</b>                          |           |           |           | 4.142  | 0.042 |
| Open                                             | 301(41.3) | 245(39.7) | 56(50.0)  |        |       |
| Closure                                          | 428(58.7) | 372(60.3) | 56(50.0)  |        |       |
| <b>Internal fixation</b>                         |           |           |           | 3.690  | 0.297 |
| Intramedullary nail                              | 461(63.2) | 391(63.4) | 70(62.5)  |        |       |
| Screw                                            | 30(4.1)   | 27(4.4)   | 3(2.7)    |        |       |
| Screw + Plate                                    | 172(23.6) | 148(24.0) | 24(21.4)  |        |       |
| Screw + Plate+ Bone graft                        | 66(9.1)   | 51(8.3)   | 15(13.4)  |        |       |
| <b>Anesthesia</b>                                |           |           |           | 0.021  | 0.885 |
| General anesthesia                               | 399(54.7) | 337(54.6) | 62(55.4)  |        |       |
| Local anesthesia                                 | 330(45.3) | 280(45.4) | 50(44.6)  |        |       |
| <b>Bone defect</b>                               |           |           |           | 2.880  | 0.090 |
| Yes                                              | 83(11.4)  | 65(10.5)  | 18(16.1)  |        |       |
| No                                               | 646(88.6) | 552(89.5) | 94(83.9)  |        |       |
| <b>Postoperative infection</b>                   |           |           |           | 0.163  | 0.687 |
| Yes                                              | 52(7.1)   | 43(7.0)   | 9(8.0)    |        |       |
| No                                               | 677(92.9) | 574(93.0) | 103(92.0) |        |       |
| <b>Deep vein thrombosis of lower extremities</b> |           |           |           | 0.434  | 0.510 |
| Yes                                              | 78(10.7)  | 68(11.0)  | 10(8.9)   |        |       |
| No                                               | 651(89.3) | 549(89.0) | 102(91.1) |        |       |
| <b>Other postoperative complications</b>         |           |           |           | 0.2    | 0.655 |
| Yes                                              | 7(1.0)    | 5(0.8)    | 2(1.8)    |        |       |
| No                                               | 722(99.0) | 612(99.2) | 110(98.2) |        |       |
| <b>Rehabilitation training</b>                   |           |           |           | 0.437  | 0.509 |
| Yes                                              | 71(9.7)   | 62(10.0)  | 9(8.0)    |        |       |
| No                                               | 658(90.3) | 555(90.0) | 103(92.0) |        |       |
| <b>Weight-bearing time (months)</b>              |           |           |           | 12.518 | 0.014 |
| 0-1                                              | 208(28.5) | 184(29.8) | 24(21.4)  |        |       |
| 1-2                                              | 214(29.4) | 190(30.8) | 24(21.4)  |        |       |
| 2-3                                              | 67(9.2)   | 52(8.4)   | 15(13.4)  |        |       |
| 3-6                                              | 199(27.3) | 159(25.8) | 40(35.7)  |        |       |
| > 6                                              | 41(5.6)   | 32(5.2)   | 9(8.0)    |        |       |
